# Supplementary material
Source: ML conference proceedings conference paper supplement (https://proceedings.neurips.cc/paper_files/paper/2016/hash/9d2682367c3935defcb1f9e247a97c0d-Abstract.html)
Supplement: Supplementary file 1 [file 9d2682367c3935defcb1f9e247a97c0d-Supplemental.zip]

---

# Supplementary Materials for Interaction Screening: Efficient and Sample-Optimal Learning of Ising Models

---

Marc Vuffray<sup>1</sup>, Sidhant Misra<sup>2</sup>, Andrey Y. Lokhov<sup>1,3</sup>, and Michael Chertkov<sup>1,3,4</sup>

<sup>1</sup>Theoretical Division T-4, Los Alamos National Laboratory, Los Alamos, NM 87545, USA

<sup>2</sup>Theoretical Division T-5, Los Alamos National Laboratory, Los Alamos, NM 87545, USA

<sup>3</sup>Center for Nonlinear Studies, Los Alamos National Laboratory, Los Alamos, NM 87545, USA

<sup>4</sup>Skolkovo Institute of Science and Technology, 143026 Moscow, Russia

{vuffray, sidhant, lokhov, chertkov}@lanl.gov

## 1 Gradient Concentration

**Lemma 1.** *For any Ising model with  $p$  spins and for all  $l \neq u \in V$*

$$\mathbb{E} [X_{ul}(\underline{\theta}_u^*)] = 0. \quad (1)$$

*Proof.* By direct computation, we find that

$$\begin{aligned} \mathbb{E} [X_{ul}(\underline{\theta}_u^*)] &= \mathbb{E} \left[ -\sigma_u \sigma_l \exp \left( - \sum_{i \in \partial u} \theta_{ui}^* \sigma_u \sigma_i \right) \right] \\ &= \frac{-1}{Z} \sum_{\underline{\sigma}} \sigma_u \sigma_l \exp \left( \sum_{(i,j) \in E} \theta_{ij}^* \sigma_i \sigma_j - \sum_{i \in \partial u} \theta_{ui}^* \sigma_u \sigma_i \right) = 0, \end{aligned} \quad (2)$$

where in the last line we use the fact that the exponential terms involving  $\sigma_u$  cancel, implying that the sum over  $\sigma_u \in \{-1, +1\}$  is zero.  $\square$

**Lemma 2.** *For any Ising model with  $p$  spins and for all  $l \neq u \in V$*

$$\mathbb{E} [X_{ul}(\underline{\theta}_u^*)^2] = 1. \quad (3)$$

*Proof.* As a result of direct evaluation one derives

$$\begin{aligned} \mathbb{E} [X_{ul}(\underline{\theta}_u^*)^2] &= \mathbb{E} \left[ \exp \left( -2 \sum_{i \in \partial u} \theta_{ui}^* \sigma_u \sigma_i \right) \right] \\ &= \frac{1}{Z} \sum_{\underline{\sigma}} \exp \left( \sum_{(i,j) \in E, i,j \neq u} \theta_{ij}^* \sigma_i \sigma_j - \sum_{i \in \partial u} \theta_{ui}^* \sigma_u \sigma_i \right) \\ &= \frac{1}{Z} \sum_{\underline{\sigma}} \exp \left( \sum_{(i,j) \in E, i,j \neq u} \theta_{ij}^* \sigma_i \sigma_j + \sum_{i \in \partial u} \theta_{ui}^* \sigma_u \sigma_i \right) \\ &= 1. \end{aligned} \quad (4)$$

Notice that in the second line the first sum over edges (under the exponential) does not depend on  $\sigma_u$ . Furthermore, the first sum is invariant under the change of variables,  $\sigma_u \rightarrow -\sigma_u$ , while the second sum changes sign. This transformation results in appearance of the partition function in the numerator.  $\square$

**Lemma 3.** *For any Ising model with  $p$  spins, with maximum degree  $d$  and maximum coupling intensity  $\beta$ , we guarantee that for all  $l \neq u \in V$*

$$|X_{ul}(\underline{\theta}_u^*)| \leq \exp(\beta d). \quad (5)$$

*Proof.* Observe that components of  $\underline{\theta}_u^*$  are smaller than  $\beta$  and at most  $d$  of them are non-zero. Recall that spins are binary,  $\{-1, +1\}$ , which results in the following estimate

$$\begin{aligned} |X_{ul}(\underline{\theta}_u^*)| &= \left| -\sigma_u \sigma_l \exp \left( - \sum_{i \in \partial u} \theta_{ui}^* \sigma_u \sigma_i \right) \right| \\ &\leq \exp \left( - \sum_{i \in \partial u} \theta_{ui}^* \sigma_u \sigma_i \right) \\ &\leq \exp(\beta d). \end{aligned} \quad (6)$$

$\square$

**Lemma 4.** *For any Ising model with  $p$  spins, with maximum degree  $d$  and maximum coupling intensity  $\beta$ . For any  $\epsilon_3 > 0$ , if the number of observation satisfies  $n \geq \exp(2\beta d) \ln \frac{2p}{\epsilon_3}$ , then the following bound holds with probability at least  $1 - \epsilon_3$ :*

$$\|\nabla \mathcal{S}_n(\underline{\theta}_u^*)\|_\infty \leq 2 \sqrt{\frac{\ln \frac{2p}{\epsilon_3}}{n}}. \quad (7)$$

*Proof.* Let us first show that every term is individually bounded by the RHS of (7) with high-probability. We further use the union bound to prove that all components are uniformly bounded with high-probability. Utilizing Lemma 1, Lemma 2 and Lemma 3 we apply the Bernstein's Inequality

$$\mathbb{P} \left[ \left| \frac{\partial}{\partial \theta_{ul}} \mathcal{S}_n(\underline{\theta}_u^*) \right| > t \right] \leq 2 \exp \left( - \frac{\frac{1}{2} t^2 n}{1 + \frac{1}{3} \exp(\beta d) t} \right). \quad (8)$$

Inverting the following relation

$$s = \frac{\frac{1}{2} t^2 n}{1 + \frac{1}{3} \exp(\beta d) t}, \quad (9)$$

and substituting the result in the Eq. (8) one derives

$$\mathbb{P} \left[ \left| \frac{\partial}{\partial \theta_{ul}} \mathcal{S}_n(\underline{\theta}_u^*) \right| > \frac{1}{3} \left( u + \sqrt{\frac{18}{\exp(\beta d)} u + u^2} \right) \right] \leq 2 \exp(-s), \quad (10)$$

where  $u = \frac{s}{n} \exp(\beta d)$ .

When  $n \geq s \exp(2\beta d)$  Eq. (10) can be simplified to become independent of  $\beta$  and  $d$

$$\mathbb{P} \left[ \left| \frac{\partial}{\partial \theta_{ul}} \mathcal{S}_n(\underline{\theta}_u^*) \right| > 2 \sqrt{\frac{s}{n}} \right] \leq 2 \exp(-s). \quad (11)$$

Using  $s = \ln \frac{2p}{\epsilon_3}$  and the union bound on every component of the gradient leads to the desired result.  $\square$

## 1.1 Restricted Strong-Convexity

We recall that the remainder of the first-order Taylor-expansion of the ISO reads

$$\delta \mathcal{S}_n(\Delta_u, \theta^*) = \frac{1}{n} \sum_{k=1}^n \exp \left( - \sum_{i \in \partial u} \theta_{ui}^* \sigma_u^{(k)} \sigma_i^{(k)} \right) \left( \exp \left( -Y_u^{(k)}(\Delta_u) \right) - 1 + Y_u^{(k)}(\Delta_u) \right), \quad (12)$$

where the random variables  $Y_u^{(k)}(\Delta_u)$  are i.i.d and are related to the spin configurations according to

$$Y_u(\Delta_u) = \sum_{i \in V \setminus u} \Delta_{ui} \sigma_u \sigma_i. \quad (13)$$

**Lemma 5.** *Consider an Ising model with  $p$  spins, with maximum degree  $d$  and maximum coupling intensity  $\beta$ . For all  $\Delta_u \in \mathbb{R}^{p-1}$  the following bound holds*

$$\mathbb{E} \left[ Y_u(\Delta_u)^2 \right] \geq \frac{e^{-2\beta d}}{d+1} \|\Delta_u\|_2^2. \quad (14)$$

*Proof.* Our proof strategy here follows [1, Cor. 3.1]. Notice that the probability measure of the Ising model is symmetric with respect to the sign flip, i.e.  $\mu(\sigma_1, \dots, \sigma_p) = \mu(-\sigma_1, \dots, -\sigma_p)$ . Thus any spin has zero mean, which implies that for every  $\Delta_u \in \mathbb{R}^{p-1}$

$$\mathbb{E} \left[ \left( \sum_{i \in V \setminus u} \Delta_{ui} \sigma_i \right) \right] = 0. \quad (15)$$

This allows to reinterpret (14) as a variance, using that  $\sigma_u^2 = 1$ ,

$$\begin{aligned} \mathbb{E} \left[ Y_u(\Delta_u)^2 \right] &= \mathbb{E} \left[ \left( \sum_{i \in V \setminus u} \Delta_{ui} \sigma_i \right)^2 \right] \\ &= \text{Var} \left[ \sum_{i \in V \setminus u} \Delta_{ui} \sigma_i \right]. \end{aligned} \quad (16)$$

Construct a subset  $A \subset V$  recursively as follows: (i) let  $i_0 = \arg\max_{j \in V \setminus u} \Delta_{uj}^2$  and define  $A_0 = \{i_0\}$ , (ii) given  $A_t = \{i_0, \dots, i_t\}$ , let  $B_t = \{j \in V \setminus A_t \mid \partial j \cap A_t = \emptyset\}$  and  $i_{t+1} = \arg\max_{j \in B_t \setminus u} \Delta_{uj}^2$  and set  $A_{t+1} = A_t \cup \{i_{t+1}\}$ , (iii) terminate when  $B_t \setminus u = \emptyset$  and declare  $A = A_t$ .

The set  $A$  possesses the following two main properties. First, every node  $i \in A$  does not have any neighbors in  $A$  and, second,

$$(d+1) \sum_{i \in A} \Delta_{ui}^2 \geq \sum_{i \in V \setminus u} \Delta_{ui}^2. \quad (17)$$

We apply the law of total variance to (16) by conditioning on the set of spins  $\underline{\sigma}_{A^c}$  whose indexes are from the complementary set  $A^c$ .

$$\begin{aligned} \text{Var} \left[ \sum_{i \in V \setminus u} \Delta_{ui} \sigma_i \right] &\geq \mathbb{E} \left[ \text{Var} \left[ \sum_{i \in V \setminus u} \Delta_{ui} \sigma_i \mid \underline{\sigma}_{A^c} \right] \right] \\ &= \sum_{i \in A} \Delta_{ui}^2 \mathbb{E} [\text{Var} [\sigma_i \mid \underline{\sigma}_{A^c}]], \end{aligned} \quad (18)$$

where in the last line one uses that the spins in  $A$  are conditionally independent given their neighbors  $\underline{\sigma}_{A^c}$ . One concludes the proof by using relation (17) and the fact that the conditional variance of a spin given its neighbors are bounded from below:

$$\begin{aligned} \text{Var} [\sigma_i \mid \underline{\sigma}_{A^c}] &= 1 - \tanh^2 \left( \sum_{j \in \partial i} \theta_{ij}^* \sigma_j \right) \\ &\geq \exp(-2\beta d). \end{aligned} \quad (19)$$

□

**Lemma 6.** Consider an Ising model with  $p$  spins, with maximum degree  $d$  and maximum coupling intensity  $\beta$ . For all  $\Delta_u \in \mathbb{R}^{p-1}$  and for all  $\epsilon_4 > 0$ , the remainder of the Taylor expansion (12) satisfies with probability at least  $1 - \epsilon_4$ , the following inequality

$$\delta \mathcal{S}_n(\Delta_u, \theta_u^*) \geq (2 + \|\Delta_u\|_1)^{-1} \left( \frac{e^{-3\beta d}}{d+1} \|\Delta_u\|_2^2 - 2\sqrt{\frac{\ln \frac{1}{\epsilon_4}}{n}} \|\Delta_u\|_1 \right), \quad (20)$$

whenever  $n \geq 4 \exp(2\beta d) \ln \frac{1}{\epsilon_4}$ .

*Proof.* This concentration property is based on the Bernstein's inequality. First of all, observe that for all  $z \in \mathbb{R}$ , the following bound holds

$$(2 + |z|)(e^{-z} - 1 + z) \geq z^2. \quad (21)$$

This implies that the remainder of the Taylor expansion (12) is lower-bounded

$$\delta \mathcal{S}_n(\Delta_u, \theta_u^*) \geq \frac{1}{n} \sum_{k=1}^n \exp \left( - \sum_{i \in \partial u} \theta_{ui}^* \sigma_u \sigma_i \right) \frac{Y_u^{(k)}(\Delta_u)^2}{2 + |Y_u^{(k)}(\Delta_u)|}. \quad (22)$$

Notice that the support of  $Y_u(\Delta_u)$  is trivially upper bounded for all  $\Delta_u \in \mathbb{R}^{p-1}$

$$|Y_u(\Delta_u)| \leq \|\Delta_u\|_1. \quad (23)$$

It implies that the expression (22) can be lower-bounded by a quadratic expression in  $Y_u^{(k)}$

$$\delta \mathcal{S}_n(\Delta_u, \theta_u^*) \geq (2 + \|\Delta_u\|_1)^{-1} \frac{1}{n} \sum_{k=1}^n \exp \left( - \sum_{i \in \partial u} \theta_{ui}^* \sigma_u \sigma_i \right) Y_u^{(k)}(\Delta_u)^2. \quad (24)$$

Then extending the technique of the type used in Lemma 2, one shows that

$$\begin{aligned} \mathbb{E} \left[ \exp \left( -2 \sum_{i \in \partial u} \theta_{ui}^* \sigma_u \sigma_i \right) Y_u(\Delta_u)^4 \right] &= \mathbb{E} [Y_u(\Delta_u)^4] \\ &\leq \|\Delta_u\|_1^4. \end{aligned} \quad (25)$$

To finish the proof we apply the Bernstein's inequality to the right-hand side of (24), thus combining relations (25), (23) and Lemma 5. Moreover when  $n \geq 4e^{2\beta d} \ln \frac{1}{\epsilon_4}$  further simplifications can be made in the way similar to the one used in Lemma 4.  $\square$

**Lemma 7.** Consider an Ising model with  $p$  spins, with maximum degree  $d$  and maximum coupling intensity  $\beta$ . For all  $\epsilon_4 > 0$ , when  $n \geq 2^{12} d^2 (1+d)^2 e^{6\beta d} \ln \frac{1}{\epsilon_4}$  the ISO satisfies, with probability at least  $1 - \epsilon_4$ , the restricted strong convexity condition

$$\delta \mathcal{S}_n(\Delta_u, \theta_u^*) \geq \frac{e^{-3\beta d}}{4(d+1)(1+2\sqrt{d}R)} \|\Delta_u\|_2^2, \quad (26)$$

for all  $\Delta_u \in \mathbb{R}^{p-1}$  such that  $\|\Delta_u\|_1 \leq 4\sqrt{d} \|\Delta_u\|_2$  and  $\|\Delta_u\|_2 \leq R$  with  $R > 0$ .

*Proof.* We prove it applying Lemma 6 directly to  $\|\Delta_u\|_1 \leq 4\sqrt{d} \|\Delta_u\|_2$  and  $\|\Delta_u\|_2 \leq R$  when  $n \geq 2^{12} d^2 (1+d)^2 e^{6\beta d} \ln \frac{1}{\epsilon_4}$ .  $\square$

## References

- [1] A. Montanari, "Computational implications of reducing data to sufficient statistics," *Electron. J. Statist.*, vol. 9, no. 2, pp. 2370–2390, 2015.
